# Supplementary material
Source: Springer Nature journal article supplement (https://www.springermedizin.de/resource/supplementary/12985_2010_796_MOESM2_ESM.pdf/9609212)

**A**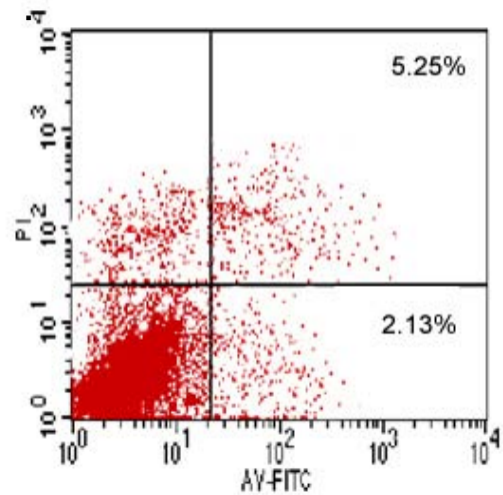**B.**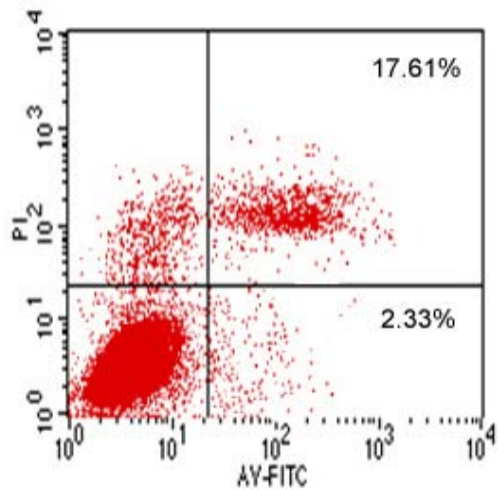

Supplement: MOESM2 [file 9609212]
